# Supplementary material
Source: Springer Nature journal article supplement (https://www.springermedizin.de/resource/supplementary/12885_2012_3920_MOESM5_ESM.pdf/9464782)

**A**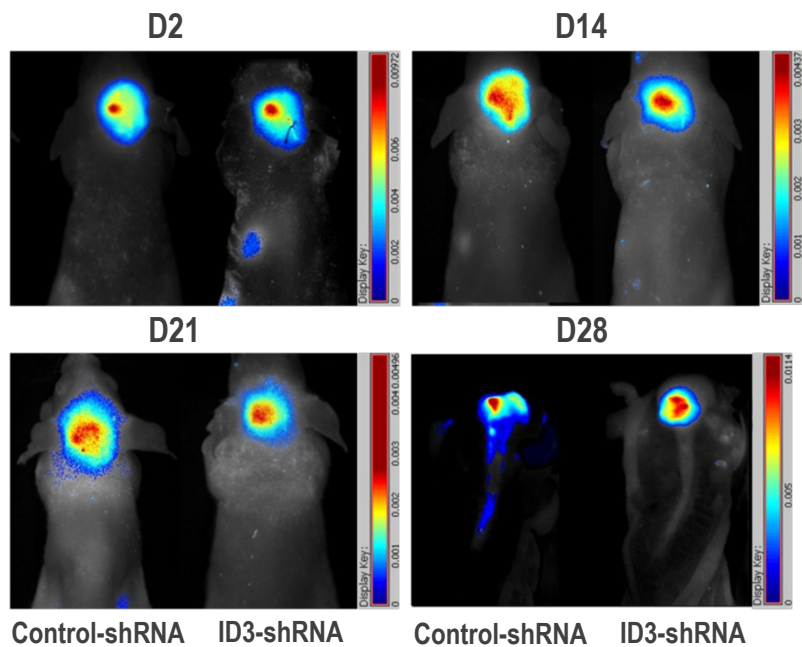**B**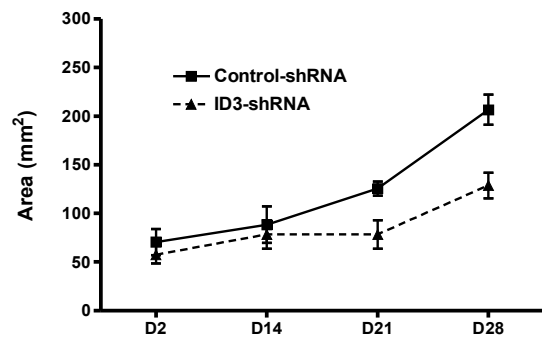**C**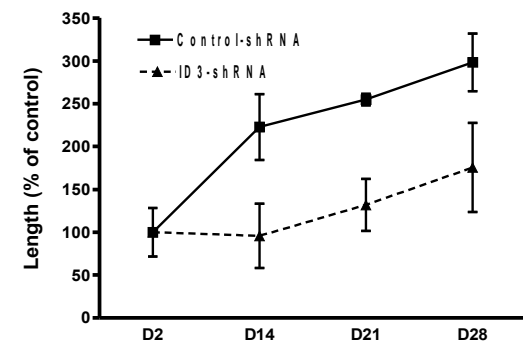**D**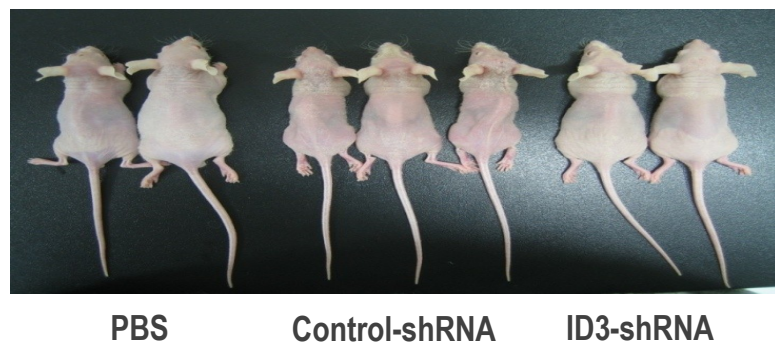**E**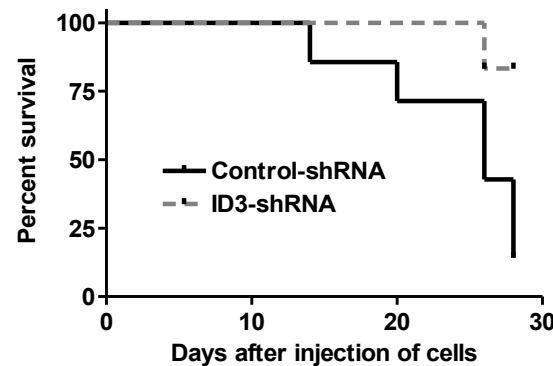

Supplement: MOESM5 [file 9464782]
